# Supplementary material for: The DNA Methylome of Human Peripheral Blood Mononuclear Cells
Source: PubMed Central journal article supplement (PMC2976721; doi:10.1371/journal.pbio.1000533), 2010-11-09
Supplement: pbio.1000533.s013.pdf [file pbio.1000533.s013.pdf]

Table S1 . Data production summary of PBMC methylome study.

a)

| Library         | Insert Size $\pm$ 3SD (bp) | Read Length (bp) | Reads Number | Raw Data (Gbp) |
|-----------------|----------------------------|------------------|--------------|----------------|
| HUMtg1RABDCAAPE | 111 $\pm$ 31               | 44               | 58,490,616   | 2.6            |
|                 |                            | 75               | 331,307,522  | 24.9           |
| HUMtg1RADSADPE  | 182 $\pm$ 46               | 44               | 45,119,798   | 2              |
|                 |                            | 75               | 366,998,694  | 27.3           |
| HUMtg2RABDCABPE | 151 $\pm$ 43               | 44               | 41,469,338   | 1.8            |
|                 |                            | 75               | 252,028,298  | 18.9           |
| HUMtg2RABDCBAPE | 96 $\pm$ 31                | 44               | 287,652,886  | 12.7           |
|                 |                            | 75               | -            | -              |
| HUMtg2RABDCBBPE | 135 $\pm$ 37               | 44               | 60,369,744   | 2.7            |
|                 |                            | 75               | 144,023,246  | 10.8           |

b)

| Read length (bp) | # of raw reads | # of aligned Reads | Aligned Bases (bp) | Effective strand depth | Unambiguous rate (%) | Mismatch rate (%) |
|------------------|----------------|--------------------|--------------------|------------------------|----------------------|-------------------|
| 44               | 493,102,382    | SE 159,881,472     | 6,779,415,037      | 1.2                    | 87.85                | 1.1               |
|                  |                | PE 209,193,248     | 9,133,788,437      | 1.6                    | 90.92                | 0.8               |
| 75               | 1,094,357,760  | SE 398,503,878     | 24,941,188,529     | 4.3                    | 82.69                | 1.8               |
|                  |                | PE 406,987,966     | 29,599,486,371     | 5.2                    | 92.11                | 1.1               |
| Total            | 1,587,460,142  | 1,174,566,564      | 70,453,878,374     | 12.3                   | 88.12                | 1.3               |
