# Supplementary material for: The DNA Methylome of Human Peripheral Blood Mononuclear Cells
Source: PubMed Central journal article supplement (PMC2976721; doi:10.1371/journal.pbio.1000533), 2010-11-09
Supplement: pbio.1000533.s014.pdf [file pbio.1000533.s014.pdf]

Table S2. GO classification of PBMC-specific hypomethylated genes.

| GO category                                                    | <i>P</i> value | Over /under represent |
|----------------------------------------------------------------|----------------|-----------------------|
| DNA damage checkpoint                                          | 0.000491011    | over                  |
| DNA-directed RNA polymerase II, core complex                   | 0.001787826    | over                  |
| nuclear mRNA splicing, via spliceosome                         | 0.00316666     | over                  |
| RNA splicing factor activity, transesterification mechanism    | 0.00344937     | over                  |
| RNA splicing                                                   | 0.003588529    | over                  |
| intracellular                                                  | 0.004397533    | over                  |
| JAK-STAT cascade                                               | 0.004687771    | over                  |
| DNA binding                                                    | 0.004835307    | over                  |
| blastocyst growth                                              | 0.004839991    | over                  |
| phosphatidylinositol-3,4-bisphosphate 3-phosphatase activity   | 0.004839991    | over                  |
| mitochondrial proton-transporting ATP synthase, catalytic core | 0.004839991    | over                  |
| regulation of protein amino acid phosphorylation               | 0.004839991    | over                  |
| nuclear inclusion body                                         | 0.004839991    | over                  |
| dipeptidyl-peptidase III activity                              | 0.004839991    | over                  |
| inositol phosphate dephosphorylation                           | 0.004839991    | over                  |
| sphinganine kinase activity                                    | 0.004839991    | over                  |
| negative regulation of JAK-STAT cascade                        | 0.004839991    | over                  |
| phosphoinositide dephosphorylation                             | 0.004839991    | over                  |
| negative regulation of protein kinase B signaling cascade      | 0.004839991    | over                  |
| sphinganine-1-phosphate biosynthetic process                   | 0.004839991    | over                  |
| inositol-1,3,4,5-tetrakisphosphate 3-phosphatase activity      | 0.004839991    | over                  |
| negative regulation of cytokine biosynthetic process           | 0.004839991    | over                  |
| ferritin complex                                               | 0.004839991    | over                  |
| negative regulation of focal adhesion formation                | 0.004839991    | over                  |
| DNA damage response, signal transduction by p53 class media    | 0.004839991    | over                  |
| regulation of fibroblast proliferation                         | 0.004839991    | over                  |
| phosphatidylinositol-3-phosphatase activity                    | 0.004839991    | over                  |
