# Supplementary material for: The DNA Methylome of Human Peripheral Blood Mononuclear Cells
Source: PubMed Central journal article supplement (PMC2976721; doi:10.1371/journal.pbio.1000533), 2010-11-09
Supplement: pbio.1000533.s015.pdf [file pbio.1000533.s015.pdf]

Table S3. GO classification of imr90-specific hypomethylated genes.

| GO category                               | <i>P</i> value | Over /under represent |
|-------------------------------------------|----------------|-----------------------|
| nucleus                                   | 7.10E-07       | under                 |
| transcription factor activity             | 0.000104627    | under                 |
| sequence-specific DNA binding             | 0.000660161    | under                 |
| serine-type endopeptidase activity        | 0.00080711     | over                  |
| rhodopsin-like receptor activity          | 0.002032473    | over                  |
| RNA binding                               | 0.002686713    | under                 |
| MHC class II receptor activity            | 0.00287155     | under                 |
| symporter activity                        | 0.003634038    | over                  |
| cAMP binding                              | 0.003682507    | over                  |
| intracellular protein transport           | 0.003757302    | under                 |
| ion transport                             | 0.004213982    | over                  |
| negative regulation of cell proliferation | 0.004355368    | under                 |
