# Supplementary material for: The DNA Methylome of Human Peripheral Blood Mononuclear Cells
Source: PubMed Central journal article supplement (PMC2976721; doi:10.1371/journal.pbio.1000533), 2010-11-09
Supplement: pbio.1000533.s017.pdf [file pbio.1000533.s017.pdf]

Table S5. Genes with hDMRs.

| YH heterozygote  | Accession number | Gene symbol | DMR location | overlap/distance (bp) |
|------------------|------------------|-------------|--------------|-----------------------|
| chr1:3133631:Y   | NM_199454        | PRDM16      | intron       | 229                   |
| chr1:3133631:Y   | NM_022114        | PRDM16      | intron       | 229                   |
| chr1:3336208:S   | NM_199454        | PRDM16      | intron       | 198                   |
| chr1:3336208:S   | NM_022114        | PRDM16      | intron       | 198                   |
| chr1:7425882:M   | NM_015215        | CAMTA1      | intron       | 251                   |
| chr1:10633865:Y  | NM_017766        | CASZ1       | intron       | 141                   |
| chr1:10633865:Y  | NM_001079843     | CASZ1       | intron       | 141                   |
| chr1:15145768:K  | NM_001017999     | KIAA1026    | intron       | 222                   |
| chr1:15145768:K  | NM_001018001     | KIAA1026    | intron       | 222                   |
| chr1:15145768:K  | NM_001018000     | KIAA1026    | intron       | 222                   |
| chr1:15145768:K  | NM_015209        | KIAA1026    | intron       | 222                   |
| chr1:15145768:K  | NM_201628        | KIAA1026    | intron       | 222                   |
| chr1:16264378:Y  | NM_182623        | FAM131C     | intron       | 340                   |
| chr1:16891185:R  | NR_026567        | ESPNP       | intron       | 285                   |
| chr1:16895697:R  | NR_026567        | ESPNP       | exon,intron  | 327                   |
| chr1:18551953:Y  | NM_032880        | IGSF21      | intron       | 205                   |
| chr1:21737466:Y  | NM_000478        | ALPL        | intron       | 250                   |
| chr1:28295434:Y  | NR_027268        | LOC653566   | exon         | 317                   |
| chr1:32040924:M  | NM_144569        | SPOCD1      | intron       | 333                   |
| chr1:77209519:S  | NM_030965        | ST6GALNAC5  | intron       | 445                   |
| chr1:108244475:Y | NM_006113        | VAV3        | intron       | 350                   |
| chr1:116952441:K | NM_001542        | IGSF3       | exon,intron  | 433                   |
| chr1:116952441:K | NM_001007237     | IGSF3       | exon,intron  | 433                   |
| chr1:143808451:K | NM_004892        | SEC22B      | intron       | 323                   |
| chr1:143808626:R | NM_004892        | SEC22B      | intron       | 457                   |
| chr1:178471594:R | NM_033343        | LHX4        | intron       | 274                   |
| chr1:218825974:R | NM_018650        | MARK1       | intron       | 134                   |
| chr1:226530871:K | NM_052843        | OBSCN       | exon         | 207                   |
| chr1:226530871:K | NM_001098623     | OBSCN       | exon         | 207                   |
| chr1:226849866:Y | NR_002834        | DUSP5P      | intron       | 397                   |
| chr1:227528424:K | NM_145257        | C1orf96     | intron       | 324                   |
| chr1:240555037:M | NM_152666        | PLD5        | intron       | 269                   |
| chr1:246167090:M | NM_175911        | OR2L13      | exon,intron  | 202                   |
| chr1:246911582:Y | NM_001004734     | OR14I1      | exon         | 295                   |
| chr10:1428597:M  | NM_018702        | ADARB2      | intron       | 253                   |
| chr10:11278201:R | NM_001025076     | CUGBP2      | intron       | 191                   |
| chr10:11278201:R | NM_001083591     | CUGBP2      | intron       | 191                   |
| chr10:11278201:R | NM_006561        | CUGBP2      | intron       | 191                   |
| chr10:11278201:R | NM_001025077     | CUGBP2      | intron       | 191                   |
| chr10:46390045:R | NM_031912        | SYT15       | intron       | 290                   |

|                   |              |          |             |     |
|-------------------|--------------|----------|-------------|-----|
| chr10:46390045:R  | NM_181519    | SYT15    | intron      | 290 |
| chr10:49331990:S  | NM_021226    | ARHGAP22 | exon,intron | 350 |
| chr10:97062308:M  | NM_001034954 | SORBS1   | exon        | 263 |
| chr10:97062308:M  | NM_001034956 | SORBS1   | exon        | 263 |
| chr10:97062308:M  | NM_024991    | SORBS1   | exon        | 263 |
| chr10:97062308:M  | NM_015385    | SORBS1   | exon        | 263 |
| chr10:97062308:M  | NM_001034955 | SORBS1   | exon        | 263 |
| chr10:97062308:M  | NM_006434    | SORBS1   | exon        | 263 |
| chr10:97062308:M  | NM_001034957 | SORBS1   | exon        | 263 |
| chr10:123862117:Y | NM_206862    | TACC2    | intron      | 318 |
| chr10:123862117:Y | NM_206861    | TACC2    | intron      | 318 |
| chr10:126346830:K | NM_014661    | FAM53B   | intron      | 265 |
| chr10:126671779:K | NM_001083914 | CTBP2    | exon,intron | 416 |
| chr10:126671779:K | NM_022802    | CTBP2    | exon,intron | 416 |
| chr10:126671779:K | NM_001329    | CTBP2    | exon,intron | 416 |
| chr10:127574384:R | NM_145235    | FANK1    | upstream    | 506 |
| chr10:127574499:R | NM_145235    | FANK1    | upstream    | 439 |
| chr10:127574488:Y | NM_145235    | FANK1    | upstream    | 552 |
| chr10:127574788:S | NM_145235    | FANK1    | upstream    | 96  |
| chr10:127575080:M | NM_145235    | FANK1    | exon,intron | 235 |
| chr10:127575425:K | NM_145235    | FANK1    | intron      | 400 |
| chr10:127604847:K | NM_145235    | FANK1    | intron      | 322 |
| chr10:135192305:S | NM_000773    | CYP2E1   | intron      | 264 |
| chr11:487359:R    | NM_002939    | RNH1     | intron      | 165 |
| chr11:487359:R    | NM_203387    | RNH1     | intron      | 165 |
| chr11:487359:R    | NM_203386    | RNH1     | intron      | 165 |
| chr11:487359:R    | NM_203388    | RNH1     | intron      | 165 |
| chr11:487359:R    | NM_203384    | RNH1     | intron      | 165 |
| chr11:487359:R    | NM_203383    | RNH1     | intron      | 165 |
| chr11:487359:R    | NM_203385    | RNH1     | intron      | 165 |
| chr11:487359:R    | NM_203389    | RNH1     | intron      | 165 |
| chr11:1007231:R   | NM_005961    | MUC6     | exon        | 329 |
| chr11:1620616:Y   | NM_053005    | HCCA2    | intron      | 232 |
| chr11:2126331:S   | NM_001042376 | INS-IGF2 | intron      | 408 |
| chr11:2126331:S   | NM_016412    | IGF2AS   | exon        | 255 |
| chr11:2126331:S   | NR_003512    | INS-IGF2 | intron      | 408 |
| chr11:2126331:S   | NM_001007139 | IGF2     | intron      | 408 |
| chr11:2787141:Y   | NM_181798    | KCNQ1    | intron      | 258 |
| chr11:2787141:Y   | NM_000218    | KCNQ1    | intron      | 258 |
| chr11:19941915:S  | NM_145117    | NAV2     | intron      | 395 |
| chr11:19941915:S  | NM_182964    | NAV2     | intron      | 395 |
| chr11:19941915:S  | NM_001111018 | NAV2     | intron      | 395 |
| chr11:61264985:R  | NM_006133    | DAGLA    | intron      | 201 |

|                   |              |               |             |     |
|-------------------|--------------|---------------|-------------|-----|
| chr11:67174754:Y  | NM_080658    | ACY3          | exon        | 47  |
| chr11:113929139:Y | NM_152315    | FAM55A        | intron      | 702 |
| chr11:122184121:Y | NM_032873    | UBASH3B       | exon,intron | 208 |
| chr12:380722:Y    | NM_032358    | CCDC77        | upstream    | 74  |
| chr12:380722:Y    | NM_001130146 | CCDC77        | upstream    | 74  |
| chr12:380722:Y    | NM_001130148 | CCDC77        | intron      | 349 |
| chr12:380722:Y    | NM_001130147 | CCDC77        | intron      | 349 |
| chr12:1330815:S   | NM_178038    | ERC1          | intron      | 340 |
| chr12:1330815:S   | NM_178037    | ERC1          | intron      | 340 |
| chr12:1330815:S   | NM_015064    | ERC1          | intron      | 340 |
| chr12:1330815:S   | NM_178039    | ERC1          | intron      | 340 |
| chr12:1330815:S   | NM_178040    | ERC1          | intron      | 340 |
| chr12:11062670:S  | NM_006250    | PRH1          | intron      | 695 |
| chr12:11062670:S  | NM_001098538 | PRR4          | intron      | 695 |
| chr12:11116497:M  | NM_006250    | PRH1          | intron      | 407 |
| chr12:11116497:M  | NM_001098538 | PRR4          | intron      | 407 |
| chr12:51377833:M  | NM_175078    | KRT77         | exon,intron | 236 |
| chr12:56503583:S  | NM_005730    | CTDSP2        | exon        | 294 |
| chr12:56503965:K  | NM_005730    | CTDSP2        | exon,intron | 292 |
| chr12:56509545:R  | NM_005730    | CTDSP2        | exon,intron | 340 |
| chr12:110944530:K | NM_006817    | ERP29         | exon        | 305 |
| chr12:110944530:K | NM_001034025 | ERP29         | exon        | 305 |
| chr12:120099514:S | NM_002562    | P2RX7         | exon,intron | 307 |
| chr12:120840540:Y | NM_144668    | WDR66         | upstream    | 155 |
| chr12:131103205:R | NM_015409    | EP400         | intron      | 183 |
| chr12:131253028:K | NM_001122636 | GALNT9        | intron      | 270 |
| chr12:131253028:K | NM_021808    | GALNT9        | intron      | 270 |
| chr13:18541183:Y  | NR_002801    | DKFZp686A1627 | intron      | 441 |
| chr13:48793645:R  | NM_030925    | CAB39L        | intron      | 280 |
| chr13:48793645:R  | NM_001079670 | CAB39L        | intron      | 280 |
| chr13:97994122:M  | NM_001032296 | STK24         | intron      | 212 |
| chr13:99433607:R  | NM_007129    | ZIC2          | intron      | 314 |
| chr13:99954646:R  | NM_001127692 | PCCA          | intron      | 212 |
| chr13:99954646:R  | NM_000282    | PCCA          | intron      | 212 |
| chr13:100866569:K | NM_052867    | NALCN         | intron      | 102 |
| chr13:107144419:K | NM_001080396 | FAM155A       | intron      | 434 |
| chr13:110069271:R | NM_018210    | CARKD         | intron      | 244 |
| chr13:113607931:S | NM_182614    | FAM70B        | intron      | 286 |
| chr13:113909298:Y | NM_007368    | RASA3         | intron      | 295 |
| chr13:114065598:S | NM_080687    | UPF3A         | exon,intron | 188 |
| chr13:114065598:S | NM_023011    | UPF3A         | exon,intron | 188 |
| chr14:22486303:M  | NM_017815    | C14orf94      | exon,intron | 405 |
| chr14:23711366:Y  | NM_001048205 | REC8          | exon        | 239 |

|                   |              |           |             |      |
|-------------------|--------------|-----------|-------------|------|
| chr14:23711366:Y  | NM_005132    | REC8      | exon,intron | 239  |
| chr14:32023501:W  | NM_004274    | AKAP6     | intron      | 468  |
| chr14:34254292:Y  | NM_138638    | CFL2      | upstream    | 503  |
| chr14:34254292:Y  | NM_021914    | CFL2      | upstream    | 1464 |
| chr14:64329980:K  | NM_000347    | SPTB      | exon        | 202  |
| chr14:64329980:K  | NM_001024858 | SPTB      | exon        | 202  |
| chr14:77449437:Y  | NM_020421    | ADCK1     | intron      | 272  |
| chr14:77449437:Y  | NM_001142545 | ADCK1     | intron      | 272  |
| chr14:78780542:Y  | NM_004796    | NRXN3     | intron      | 281  |
| chr14:100363281:M | NR_002766    | MEG3      | intron      | 202  |
| chr14:100363281:M | NR_003530    | MEG3      | intron      | 202  |
| chr14:100363281:M | NR_003531    | MEG3      | intron      | 202  |
| chr14:103646201:R | NM_001080464 | ASPG      | intron      | 193  |
| chr14:104779371:R | NM_001519    | BRF1      | intron      | 241  |
| chr14:104779371:R | NM_145685    | BRF1      | intron      | 241  |
| chr15:24518540:S  | NM_000814    | GABRB3    | intron      | 307  |
| chr15:24518540:S  | NM_021912    | GABRB3    | intron      | 307  |
| chr15:27183361:Y  | NM_001130414 | APBA2     | intron      | 237  |
| chr15:27183361:Y  | NM_005503    | APBA2     | intron      | 237  |
| chr15:29587002:R  | NM_130901    | OTUD7A    | intron      | 193  |
| chr15:32658265:M  | NM_001023567 | GOLGA8B   | intron      | 259  |
| chr15:49700263:R  | NM_015263    | DMXL2     | intron      | 373  |
| chr15:82348680:K  | NM_207517    | ADAMTSL3  | intron      | 329  |
| chr15:83752652:R  | NM_006738    | AKAP13    | intron      | 333  |
| chr15:83752652:R  | NM_007200    | AKAP13    | intron      | 333  |
| chr15:84112597:M  | NM_022480    | KLHL25    | exon        | 193  |
| chr15:88546567:R  | NM_198925    | SEMA4B    | intron      | 180  |
| chr15:88546567:R  | NM_020210    | SEMA4B    | intron      | 180  |
| chr15:97467811:S  | NM_145728    | SYNM      | intron      | 319  |
| chr15:97467811:S  | NM_015286    | SYNM      | intron      | 319  |
| chr16:534472:M    | NM_005632    | SOLH      | intron      | 169  |
| chr16:798095:R    | NM_001013638 | LOC388199 | intron      | 168  |
| chr16:920089:R    | NM_022773    | LMF1      | intron      | 350  |
| chr16:3490148:M   | NM_015041    | CLUAP1    | upstream    | 748  |
| chr16:4081729:Y   | NM_001116    | ADCY9     | intron      | 219  |
| chr16:6815929:Y   | NM_001142334 | A2BP1     | intron      | 225  |
| chr16:6815929:Y   | NM_001142333 | A2BP1     | intron      | 225  |
| chr16:6815929:Y   | NM_018723    | A2BP1     | intron      | 225  |
| chr16:10112679:W  | NM_001134408 | GRIN2A    | intron      | 244  |
| chr16:10112679:W  | NM_001134407 | GRIN2A    | intron      | 244  |
| chr16:10112679:W  | NM_000833    | GRIN2A    | intron      | 244  |
| chr16:28525472:Y  | NM_001055    | SULT1A1   | exon,intron | 265  |
| chr16:28525472:Y  | NM_177536    | SULT1A1   | exon,intron | 265  |

|                  |              |           |             |     |
|------------------|--------------|-----------|-------------|-----|
| chr16:28525472:Y | NM_177529    | SULT1A1   | exon,intron | 265 |
| chr16:28525472:Y | NM_177530    | SULT1A1   | exon,intron | 265 |
| chr16:28525472:Y | NM_177534    | SULT1A1   | exon,intron | 265 |
| chr16:31109809:R | NM_004960    | FUS       | exon,intron | 329 |
| chr16:69470887:R | NM_032821    | HYDIN     | exon,intron | 238 |
| chr16:69512693:R | NM_032821    | HYDIN     | exon,intron | 214 |
| chr16:69619885:Y | NM_017558    | HYDIN     | intron      | 415 |
| chr16:69619885:Y | NM_032821    | HYDIN     | intron      | 415 |
| chr16:79848365:Y | NM_017429    | BCMO1     | intron      | 293 |
| chr16:87097703:M | NM_153813    | ZFPM1     | intron      | 212 |
| chr16:87296901:R | NM_178841    | RNF166    | intron      | 243 |
| chr16:87527804:K | NM_175931    | CBFA2T3   | intron      | 260 |
| chr16:87527804:K | NM_005187    | CBFA2T3   | intron      | 260 |
| chr17:84936:R    | NM_006987    | RPH3AL    | intron      | 240 |
| chr17:1477461:M  | NM_152346    | SLC43A2   | intron      | 215 |
| chr17:8943190:R  | NM_004822    | NTN1      | intron      | 245 |
| chr17:20723886:S | NM_001004306 | CCDC144NL | intron      | 368 |
| chr17:21154730:Y | NM_002756    | MAP2K3    | intron      | 363 |
| chr17:21154730:Y | NM_145109    | MAP2K3    | intron      | 363 |
| chr17:21749692:K | NM_203392    | FAM27L    | exon,intron | 238 |
| chr17:42621661:S | NM_001114091 | CDC27     | exon        | 152 |
| chr17:42621661:S | NM_001256    | CDC27     | exon        | 152 |
| chr17:45425740:R | NM_005220    | DLX3      | exon,intron | 189 |
| chr17:58044277:M | NM_006852    | TLK2      | exon        | 357 |
| chr17:58044277:M | NM_001112707 | TLK2      | exon        | 357 |
| chr17:71529149:K | NM_001988    | EVPL      | exon,intron | 205 |
| chr17:74710619:M | NM_001082575 | HRNBP3    | intron      | 333 |
| chr17:75660805:R | NM_017950    | CCDC40    | intron      | 293 |
| chr17:77041649:S | NM_001080519 | BAHCC1    | intron      | 181 |
| chr18:12602345:Y | NM_001128626 | SPIRE1    | intron      | 444 |
| chr18:12602345:Y | NM_001128627 | SPIRE1    | intron      | 444 |
| chr18:12602345:Y | NM_020148    | SPIRE1    | intron      | 444 |
| chr18:42590883:M | NM_013305    | ST8SIA5   | exon        | 296 |
| chr18:45974364:K | NM_001080467 | MYO5B     | intron      | 250 |
| chr18:72245281:R | NM_014643    | ZNF516    | intron      | 305 |
| chr18:72947624:Y | NM_001025100 | MBP       | intron      | 361 |
| chr18:72947624:Y | NM_001025101 | MBP       | intron      | 361 |
| chr18:75373624:Y | NM_172389    | NFATC1    | intron      | 163 |
| chr18:75373624:Y | NM_172387    | NFATC1    | intron      | 163 |
| chr18:75373624:Y | NM_006162    | NFATC1    | intron      | 163 |
| chr18:75373624:Y | NM_172388    | NFATC1    | intron      | 163 |
| chr18:75774550:R | NM_025078    | PQLC1     | intron      | 115 |
| chr19:3320572:K  | NM_005597    | NFIC      | intron      | 254 |

|                  |              |            |             |      |
|------------------|--------------|------------|-------------|------|
| chr19:3320572:K  | NM_205843    | NFIC       | intron      | 254  |
| chr19:12737964:S | NM_001100176 | HOOK2      | exon,intron | 193  |
| chr19:12737964:S | NM_013312    | HOOK2      | exon,intron | 193  |
| chr19:17458830:K | NM_198580    | SLC27A1    | exon,intron | 156  |
| chr19:18118750:Y | NM_015016    | MAST3      | exon,intron | 170  |
| chr19:37875509:M | NM_001105570 | NUDT19     | exon,intron | 163  |
| chr19:41335535:K | NM_001864    | COX7A1     | exon        | 172  |
| chr19:44157852:W | NM_024907    | FBXO17     | intron      | 191  |
| chr19:49345887:M | NM_006630    | ZNF234     | intron      | 311  |
| chr19:49345887:M | NM_001144824 | ZNF234     | intron      | 311  |
| chr19:50182410:R | NM_001294    | CLPTM1     | exon,intron | 158  |
| chr19:55104029:S | NM_016553    | NUP62      | exon        | 99   |
| chr19:55104029:S | NM_012346    | NUP62      | exon        | 99   |
| chr19:55104029:S | NM_153718    | NUP62      | exon        | 99   |
| chr19:55104029:S | NM_153719    | NUP62      | exon        | 99   |
| chr19:55104029:S | NM_172374    | IL4I1      | intron      | 99   |
| chr19:62042275:Y | NR_024059    | MIMT1      | upstream    | 1651 |
| chr19:62042275:Y | NM_006210    | PEG3       | intron      | 342  |
| chr19:62042275:Y | NM_015363    | ZIM2       | intron      | 342  |
| chr19:62043863:Y | NR_024059    | MIMT1      | upstream    | 56   |
| chr19:62043863:Y | NM_006210    | PEG3       | exon        | 53   |
| chr19:62043863:Y | NM_015363    | ZIM2       | exon        | 64   |
| chr19:63247744:S | NM_182572    | ZSCAN1     | intron      | 309  |
| chr19:63559937:K | NM_198458    | ZNF497     | exon        | 294  |
| chr2:8738035:M   | NM_002166    | ID2        | upstream    | 1338 |
| chr2:24950576:S  | NM_004036    | ADCY3      | intron      | 337  |
| chr2:28621854:R  | NM_153021    | PLB1       | intron      | 248  |
| chr2:63505500:R  | NM_015910    | C2orf86    | intron      | 233  |
| chr2:63505500:R  | NM_001042692 | C2orf86    | intron      | 233  |
| chr2:71059484:R  | NM_024933    | ANKRD53    | exon,intron | 273  |
| chr2:71059484:R  | NM_001115116 | ANKRD53    | exon,intron | 273  |
| chr2:94899427:R  | NM_144705    | TEKT4      | upstream    | 1233 |
| chr2:94903947:M  | NM_144705    | TEKT4      | intron      | 278  |
| chr2:100951327:Y | NM_002518    | NPAS2      | exon,intron | 106  |
| chr2:109113174:W | NM_001099289 | SH3RF3     | intron      | 184  |
| chr2:132727352:M | NR_027020    | NCRNA00164 | intron      | 329  |
| chr2:132728084:R | NR_027020    | NCRNA00164 | intron      | 364  |
| chr2:132730409:M | NR_027020    | NCRNA00164 | intron      | 220  |
| chr2:132731578:R | NR_027020    | NCRNA00164 | exon,intron | 320  |
| chr2:218895611:Y | NM_022572    | PNKD       | upstream    | 455  |
| chr2:218895611:Y | NM_015488    | PNKD       | intron      | 169  |
| chr2:236284095:R | NM_001037131 | AGAP1      | intron      | 256  |
| chr2:236284095:R | NM_014914    | AGAP1      | intron      | 256  |

|                  |              |          |             |      |
|------------------|--------------|----------|-------------|------|
| chr2:238479562:M | NM_005855    | RAMP1    | intron      | 286  |
| chr2:239649115:Y | NM_006037    | HDAC4    | intron      | 293  |
| chr2:239932430:Y | NM_006037    | HDAC4    | intron      | 261  |
| chr2:241356473:Y | NM_004321    | KIF1A    | intron      | 125  |
| chr2:241699664:M | NM_015148    | PASK     | intron      | 285  |
| chr2:241706887:R | NM_015148    | PASK     | intron      | 231  |
| chr2:242083482:K | NM_006374    | STK25    | exon        | 244  |
| chr20:4090809:R  | NM_175840    | SMOX     | intron      | 216  |
| chr20:4090809:R  | NM_175841    | SMOX     | intron      | 216  |
| chr20:4090809:R  | NM_175842    | SMOX     | intron      | 216  |
| chr20:4090809:R  | NM_175839    | SMOX     | intron      | 216  |
| chr20:25696285:R | NR_027061    | MGC51338 | intron      | 820  |
| chr20:56849390:R | NM_016592    | GNAS     | exon,intron | 279  |
| chr20:56849390:R | NR_002785    | GNASAS   | intron      | 279  |
| chr20:56851466:Y | NM_016592    | GNAS     | intron      | 321  |
| chr20:56851466:Y | NR_002785    | GNASAS   | intron      | 321  |
| chr20:56860527:Y | NM_080425    | GNAS     | upstream    | 853  |
| chr20:56860527:Y | NM_001077490 | GNAS     | upstream    | 853  |
| chr20:56860527:Y | NM_016592    | GNAS     | intron      | 196  |
| chr20:56860527:Y | NR_002785    | GNASAS   | upstream    | 1027 |
| chr20:56863963:W | NM_001077490 | GNAS     | intron      | 179  |
| chr20:56863963:W | NM_080425    | GNAS     | intron      | 179  |
| chr20:56863963:W | NM_016592    | GNAS     | intron      | 179  |
| chr20:56896867:S | NR_003259    | GNAS     | upstream    | 504  |
| chr20:56896867:S | NM_001077490 | GNAS     | intron      | 368  |
| chr20:56896867:S | NM_080425    | GNAS     | intron      | 368  |
| chr20:56896867:S | NM_016592    | GNAS     | intron      | 368  |
| chr20:59337797:Y | NM_001794    | CDH4     | intron      | 249  |
| chr20:60990433:R | NM_080797    | DIDO1    | exon        | 253  |
| chr20:60990433:R | NM_033081    | DIDO1    | intron      | 253  |
| chr20:62329137:S | NM_004535    | MYT1     | exon,intron | 311  |
| chr21:14274743:Y | NR_027270    | C21orf81 | exon        | 29   |
| chr21:32167598:S | NM_014586    | HUNK     | exon        | 254  |
| chr21:38551067:R | NM_170736    | KCNJ15   | exon,intron | 259  |
| chr21:38551067:R | NM_002243    | KCNJ15   | exon,intron | 259  |
| chr21:42192603:M | NM_015500    | C2CD2    | exon,intron | 368  |
| chr21:42192603:M | NM_199050    | C2CD2    | exon,intron | 368  |
| chr21:44530416:Y | NM_000383    | AIRE     | exon,intron | 187  |
| chr21:45468901:R | NM_001145407 | ADARB1   | intron      | 264  |
| chr21:45468901:R | NM_015833    | ADARB1   | intron      | 264  |
| chr21:45468901:R | NM_001033049 | ADARB1   | intron      | 264  |
| chr21:45468901:R | NM_001112    | ADARB1   | exon        | 264  |
| chr21:45468901:R | NM_015834    | ADARB1   | intron      | 264  |

|                  |              |          |             |      |
|------------------|--------------|----------|-------------|------|
| chr22:19109604:K | NM_153334    | SCARF2   | exon        | 157  |
| chr22:19109604:K | NM_182895    | SCARF2   | exon        | 157  |
| chr22:20622217:Y | NM_014634    | PPM1F    | intron      | 290  |
| chr22:22464394:Y | NM_001007468 | SMARCB1  | intron      | 261  |
| chr22:22464394:Y | NM_003073    | SMARCB1  | intron      | 261  |
| chr22:27405694:S | NM_001145418 | TTC28    | exon        | 219  |
| chr22:28611138:R | NM_021090    | MTMR3    | intron      | 654  |
| chr22:28611138:R | NM_153051    | MTMR3    | intron      | 654  |
| chr22:28611138:R | NM_153050    | MTMR3    | intron      | 654  |
| chr22:45238564:R | NM_014246    | CELSR1   | exon        | 211  |
| chr22:45576719:R | NM_014346    | TBC1D22A | intron      | 286  |
| chr22:47435334:R | NM_015381    | FAM19A5  | intron      | 98   |
| chr22:47435334:R | NM_001082967 | FAM19A5  | intron      | 98   |
| chr22:48412318:R | NR_026997    | C22orf34 | intron      | 207  |
| chr22:48436472:R | NR_026997    | C22orf34 | exon        | 288  |
| chr22:48815745:R | NM_001080447 | TTLL8    | intron      | 449  |
| chr22:49244892:R | NM_002972    | SBF1     | exon        | 112  |
| chr3:16221473:Y  | NM_054110    | GALNTL2  | intron      | 121  |
| chr3:75876258:R  | NM_001128223 | ZNF717   | intron      | 609  |
| chr3:140145697:R | NM_023067    | FOXL2    | exon        | 91   |
| chr3:196974738:S | NM_004532    | MUC4     | exon,intron | 276  |
| chr3:196974738:S | NM_018406    | MUC4     | exon,intron | 276  |
| chr3:196974738:S | NM_138297    | MUC4     | exon,intron | 276  |
| chr3:197019179:M | NM_004532    | MUC4     | intron      | 276  |
| chr3:197019179:M | NM_018406    | MUC4     | intron      | 276  |
| chr3:197019179:M | NM_138297    | MUC4     | intron      | 276  |
| chr4:1210862:Y   | NM_001012614 | CTBP1    | intron      | 259  |
| chr4:1210862:Y   | NM_001328    | CTBP1    | intron      | 259  |
| chr4:2273521:S   | NM_020972    | ZFYVE28  | intron      | 149  |
| chr4:2388243:S   | NM_020972    | ZFYVE28  | intron      | 295  |
| chr4:4278909:R   | NM_177998    | OTOP1    | exon,intron | 448  |
| chr4:4279357:K   | NM_177998    | OTOP1    | exon        | 294  |
| chr4:7430406:M   | NM_020777    | SORCS2   | intron      | 331  |
| chr4:40913388:Y  | NM_173075    | APBB2    | upstream    | 1931 |
| chr4:113705494:M | NM_001099776 | LOC91431 | intron      | 280  |
| chr4:152549944:S | NM_001109977 | FAM160A1 | exon,intron | 256  |
| chr4:170006774:R | NM_016081    | PALLD    | intron      | 271  |
| chr4:184048481:R | NM_001012732 | DCTD     | exon        | 301  |
| chr4:184048481:R | NM_001921    | DCTD     | exon        | 301  |
| chr4:191098899:R | NM_004477    | FRG1     | exon        | 252  |
| chr5:1140868:Y   | NM_006598    | SLC12A7  | intron      | 213  |
| chr5:1647879:S   | NR_003263    | SDHAP3   | upstream    | 80   |
| chr5:7902989:S   | NM_001089584 | C5orf49  | intron      | 319  |



|                  |              |               |             |     |
|------------------|--------------|---------------|-------------|-----|
| chr5:9752519:Y   | NR_027112    | LOC285692     | intron      | 257 |
| chr5:75612211:S  | NM_014979    | SV2C          | intron      | 179 |
| chr5:118719592:M | NM_014350    | TNFAIP8       | exon        | 166 |
| chr5:118719592:M | NM_001077654 | TNFAIP8       | intron      | 185 |
| chr5:134287366:R | NM_032151    | PCBD2         | intron      | 554 |
| chr5:134287698:Y | NM_032151    | PCBD2         | intron      | 257 |
| chr5:134288288:R | NM_032151    | PCBD2         | intron      | 374 |
| chr5:134288729:R | NM_032151    | PCBD2         | intron      | 352 |
| chr5:134288945:R | NM_032151    | PCBD2         | intron      | 383 |
| chr5:134289274:R | NM_032151    | PCBD2         | intron      | 355 |
| chr5:134290558:R | NM_032151    | PCBD2         | intron      | 436 |
| chr5:134290858:R | NM_032151    | PCBD2         | intron      | 437 |
| chr5:134291008:Y | NM_032151    | PCBD2         | intron      | 534 |
| chr5:134291300:R | NM_032151    | PCBD2         | intron      | 383 |
| chr5:134291910:R | NM_032151    | PCBD2         | intron      | 420 |
| chr5:178383601:Y | NM_001136116 | DKFZp686E2433 | intron      | 586 |
| chr5:178919042:R | NM_001040451 | RUFY1         | upstream    | 133 |
| chr5:178919042:R | NM_001040452 | RUFY1         | upstream    | 133 |
| chr5:178919042:R | NM_025158    | RUFY1         | intron      | 273 |
| chr5:178919238:M | NM_001040451 | RUFY1         | exon        | 18  |
| chr5:178919238:M | NM_001040452 | RUFY1         | exon        | 18  |
| chr5:178919238:M | NM_025158    | RUFY1         | intron      | 266 |
| chr5:179978950:S | NM_002020    | FLT4          | exon,intron | 254 |
| chr5:179978950:S | NM_182925    | FLT4          | exon,intron | 254 |
| chr6:236744:S    | NM_020185    | DUSP22        | upstream    | 203 |
| chr6:238274:M    | NM_020185    | DUSP22        | intron      | 301 |
| chr6:261343:R    | NM_020185    | DUSP22        | intron      | 310 |
| chr6:6559333:M   | NM_004271    | LY86          | intron      | 317 |
| chr6:6559333:M   | NR_026970    | LOC285780     | intron      | 317 |
| chr6:29756098:R  | NM_001109809 | ZFP57         | intron      | 256 |
| chr6:29756543:Y  | NM_001109809 | ZFP57         | intron      | 279 |
| chr6:29904285:R  | NM_002127    | HLA-G         | exon,intron | 258 |
| chr6:30001557:R  | NR_001317    | HCG4P6        | upstream    | 60  |
| chr6:30019298:K  | NM_002116    | HLA-A         | exon,intron | 165 |
| chr6:30019298:K  | NM_001080840 | HLA-A29.1     | exon,intron | 165 |
| chr6:30052347:Y  | NM_005844    | HCG9          | intron      | 224 |
| chr6:30052347:Y  | NM_001080840 | HLA-A29.1     | intron      | 224 |
| chr6:30147077:Y  | NM_025236    | RNF39         | exon        | 174 |
| chr6:30147077:Y  | NM_170769    | RNF39         | exon,intron | 174 |
| chr6:31663371:M  | NM_205837    | LST1          | intron      | 320 |
| chr6:31663371:M  | NM_205840    | LST1          | intron      | 320 |
| chr6:31663371:M  | NM_007161    | LST1          | exon,intron | 320 |
| chr6:31663371:M  | NM_205839    | LST1          | intron      | 320 |

|                  |              |           |             |     |
|------------------|--------------|-----------|-------------|-----|
| chr6:31663371:M  | NM_205838    | LST1      | intron      | 320 |
| chr6:32836871:R  | NR_003937    | HLA-DQB2  | intron      | 296 |
| chr6:32836920:R  | NR_003937    | HLA-DQB2  | intron      | 210 |
| chr6:32836924:Y  | NR_003937    | HLA-DQB2  | intron      | 237 |
| chr6:36845477:R  | NM_020939    | CPNE5     | intron      | 183 |
| chr6:42152923:R  | NM_138572    | TAF8      | exon,intron | 217 |
| chr6:136652565:M | NM_014739    | BCLAF1    | exon,intron | 257 |
| chr6:136652565:M | NM_001077441 | BCLAF1    | exon,intron | 257 |
| chr6:136652565:M | NM_001077440 | BCLAF1    | exon,intron | 257 |
| chr6:136652610:Y | NM_014739    | BCLAF1    | exon,intron | 148 |
| chr6:136652610:Y | NM_001077441 | BCLAF1    | exon,intron | 148 |
| chr6:136652610:Y | NM_001077440 | BCLAF1    | exon,intron | 148 |
| chr6:150112222:S | NM_005389    | PCMT1     | upstream    | 286 |
| chr6:158790069:R | NM_020245    | TULP4     | exon,intron | 294 |
| chr6:158790069:R | NM_001007466 | TULP4     | exon,intron | 294 |
| chr6:158985741:S | NM_006519    | DYNLT1    | exon,intron | 41  |
| chr6:166780986:R | NM_001006932 | RPS6KA2   | intron      | 197 |
| chr6:166780986:R | NM_021135    | RPS6KA2   | intron      | 197 |
| chr7:576303:R    | NM_002735    | PRKAR1B   | intron      | 173 |
| chr7:592504:Y    | NM_002735    | PRKAR1B   | intron      | 264 |
| chr7:1589301:S   | NR_027329    | KIAA1908  | exon,intron | 317 |
| chr7:1589301:S   | NR_027328    | KIAA1908  | intron      | 317 |
| chr7:1589301:S   | NR_021487    | KIAA1908  | exon,intron | 317 |
| chr7:2609626:R   | NM_152558    | IQCE      | intron      | 267 |
| chr7:2609626:R   | NM_001100390 | IQCE      | intron      | 267 |
| chr7:19122981:S  | NM_000474    | TWIST1    | exon        | 330 |
| chr7:48934541:Y  | NR_003595    | CDC14C    | upstream    | 58  |
| chr7:56054813:K  | NM_004577    | PSPH      | exon,intron | 424 |
| chr7:102874071:K | NM_198999    | SLC26A5   | upstream    | 105 |
| chr7:102874071:K | NM_206885    | SLC26A5   | upstream    | 105 |
| chr7:102874071:K | NM_206883    | SLC26A5   | upstream    | 105 |
| chr7:102874071:K | NM_206884    | SLC26A5   | upstream    | 105 |
| chr7:135274877:S | NM_145808    | MTPN      | intron      | 277 |
| chr7:135274877:S | NM_001128619 | LUZP6     | intron      | 277 |
| chr7:139772308:R | NM_001008749 | RAB19     | exon        | 249 |
| chr7:153522774:Y | NM_130797    | DPP6      | intron      | 312 |
| chr7:153522774:Y | NM_001039350 | DPP6      | intron      | 312 |
| chr7:157996235:R | NM_130842    | PTPRN2    | intron      | 282 |
| chr7:157996235:R | NM_130843    | PTPRN2    | intron      | 282 |
| chr7:157996235:R | NM_002847    | PTPRN2    | intron      | 282 |
| chr7:158603416:Y | NM_003382    | VIPR2     | intron      | 331 |
| chr8:169693:K    | NR_003572    | RPL23AP53 | intron      | 133 |
| chr8:1630014:K   | NM_004745    | DLGAP2    | intron      | 179 |

|                  |              |          |             |      |
|------------------|--------------|----------|-------------|------|
| chr8:1637157:R   | NM_004745    | DLGAP2   | exon        | 242  |
| chr8:1641097:R   | NM_004745    | DLGAP2   | exon        | 331  |
| chr8:2053369:M   | NM_003970    | MYOM2    | intron      | 286  |
| chr8:2872872:R   | NM_033225    | CSMD1    | intron      | 284  |
| chr8:11743990:K  | NM_001908    | CTSB     | exon,intron | 186  |
| chr8:11743990:K  | NM_147781    | CTSB     | exon,intron | 186  |
| chr8:11743990:K  | NM_147782    | CTSB     | exon,intron | 186  |
| chr8:11743990:K  | NM_147783    | CTSB     | exon,intron | 186  |
| chr8:11743990:K  | NM_147780    | CTSB     | exon,intron | 186  |
| chr8:101246933:M | NM_003114    | SPAG1    | intron      | 302  |
| chr8:101246933:M | NM_172218    | SPAG1    | intron      | 302  |
| chr8:128958553:M | NR_003367    | PVT1     | intron      | 166  |
| chr8:142230214:M | NM_014957    | DENND3   | exon,intron | 283  |
| chr9:34642330:R  | NM_004512    | IL11RA   | upstream    | 1424 |
| chr9:34642330:R  | NM_147162    | IL11RA   | upstream    | 1424 |
| chr9:34642330:R  | NM_001142784 | IL11RA   | exon,intron | 315  |
| chr9:95469224:R  | NM_005392    | PHF2     | exon,intron | 346  |
| chr9:97278179:R  | NM_001083607 | PTCH1    | exon,intron | 326  |
| chr9:97278179:R  | NM_000264    | PTCH1    | exon,intron | 326  |
| chr9:97278179:R  | NM_001083604 | PTCH1    | exon,intron | 326  |
| chr9:97278179:R  | NM_001083603 | PTCH1    | exon,intron | 326  |
| chr9:97278179:R  | NM_001083602 | PTCH1    | exon,intron | 326  |
| chr9:97278179:R  | NM_001083605 | PTCH1    | exon,intron | 326  |
| chr9:97278179:R  | NM_001083606 | PTCH1    | exon,intron | 326  |
| chr9:128224283:R | NM_033446    | FAM125B  | intron      | 208  |
| chr9:129266518:W | NM_001005374 | LRSAM1   | intron      | 251  |
| chr9:129266518:W | NM_138361    | LRSAM1   | intron      | 251  |
| chr9:129266518:W | NM_001005373 | LRSAM1   | intron      | 251  |
| chr9:129871150:R | NM_001006641 | SLC25A25 | intron      | 227  |
| chr9:129871150:R | NM_197956    | NAIF1    | upstream    | 1665 |
| chr9:135074989:Y | NM_014581    | OBP2B    | upstream    | 449  |
| chr9:138835832:S | NM_017995    | C9orf86  | intron      | 206  |
| chr9:138835832:S | NM_024718    | C9orf86  | intron      | 206  |

---
