# Supplementary material for: The DNA Methylome of Human Peripheral Blood Mononuclear Cells
Source: PLoS Biol. 2010 Nov 9;8(11):e1000533. doi: 10.1371/journal.pbio.1000533 (PMC2976721; doi:10.1371/journal.pbio.1000533)
Supplement: Table S6 — Validation of expression level of both alleles for genes displaying allele-specific methylation. (0.01 MB PDF) [file pbio.1000533.s018.pdf]

Table S6. Validation of expression level of both alleles for genes displaying allele-specific methylation.

| Accession numbe | Gene   | SNP pos | Allele 1 | Allele 2 | Methyl%<br>of allele 1 | Methyl%<br>of allele 2 | Count of<br>allele1 | Cout of<br>allele2 | Fold<br>difference |
|-----------------|--------|---------|----------|----------|------------------------|------------------------|---------------------|--------------------|--------------------|
| NM_023011       | UPF3A  | 992     | G        | A        | 11.27                  | 64.1                   | 17                  | 4                  | 4.25               |
| NM_001077440    | BCLAF1 | 1906    | T        | A        | 100                    | 0                      | 30                  | 0                  | >10                |
| NM_001256       | CDC27  | 1350    | G        | A        | 17.24                  | 85.88                  | 22                  | 3                  | 7.33               |
| NM_001256       | CDC27  | 1561    | C        | A        | 17.24                  | 85.88                  | 22                  | 3                  | 7.33               |
| NM_020185       | DUSP22 | 1066    | T        | A        | 60                     | 0                      | 30                  | 0                  | >10                |
| NM_175911       | OR2L13 | 1678    | C        | T        | 7.26                   | 92.31                  | 17                  | 11                 | 1.55               |
| NM_052867       | NALCN  | 6424    | T        | C        | 4.35                   | 78.57                  | 13                  | 11                 | 1.18               |
