# Supplementary material for: The DNA Methylome of Human Peripheral Blood Mononuclear Cells
Source: PLoS Biol. 2010 Nov 9;8(11):e1000533. doi: 10.1371/journal.pbio.1000533 (PMC2976721; doi:10.1371/journal.pbio.1000533)
Supplement: Table S7 — GO classification of allele-specific methylated genes. (0.06 MB PDF) [file pbio.1000533.s019.pdf]

Table S7. GO classification of allele-specific methylated genes.

| GO category                                                 | # of genes | # of allele-specific methylated genes | P-value  | Over/under-represent | # of heterozygotes (TSS +/- 2k) | P-value  | heterozygous level comparing to average | Accessions                                        | Gene names   |
|-------------------------------------------------------------|------------|---------------------------------------|----------|----------------------|---------------------------------|----------|-----------------------------------------|---------------------------------------------------|--------------|
| regulation of cell shape                                    | 9          | 54                                    | 1.56E-12 | Over                 | 57                              | 0.025013 | more                                    | NM_007161,NM_198999,NM_205837,NM_20583            | LST1,SLC26A5 |
| negative regulation of lymphocyte proliferation             | 5          | 5                                     | 1.14E-10 | Over                 | 21                              | 0.530855 | more                                    | 8,NM_205839,NM_206883,NM_206884,NM_206885         |              |
| dendrite development                                        | 5          | 6                                     | 2.08E-10 | Over                 | 21                              | 0.530855 | more                                    | NM_007161,NM_205837,NM_205838,NM_205839,NM_205840 | LST1         |
| cell morphogenesis                                          | 5          | 11                                    | 1.94E-09 | Over                 | 21                              | 0.530855 | more                                    | NM_007161,NM_205837,NM_205838,NM_205839,NM_205840 | LST1         |
| secondary active sulfate transmembrane transporter activity | 4          | 16                                    | 6.08E-07 | Over                 | 36                              | 0.028165 | more                                    | NM_198999,NM_206883,NM_206884,NM_206885           | SLC26A5      |
| sulfate transport                                           | 4          | 22                                    | 1.84E-06 | Over                 | 36                              | 0.028165 | more                                    | NM_198999,NM_206883,NM_206884,NM_206885           | SLC26A5      |
| guanylnucleotide binding                                    | 3          | 7                                     | 4.47E-06 | Over                 | 15                              | 0.432582 | more                                    | NM_001077490,NM_016592,NM_080425                  | GNAS         |

|                                                           |   |     |          |      |    |          |      |                                               |                |
|-----------------------------------------------------------|---|-----|----------|------|----|----------|------|-----------------------------------------------|----------------|
| G-protein signaling, adenylate cyclase activating pathway | 3 | 8   | 6.13E-06 | Over | 15 | 0.432582 | more | NM_001077490,NM_016592,NM_080425              | GNAS           |
| motor activity                                            | 5 | 87  | 1.75E-05 | Over | 40 | 0.029222 | more | NM_001080467,NM_198999,NM_206883,NM_206885    | MYO5B,S LC26A5 |
| phospholipid dephosphorylation                            | 3 | 20  | 6.38E-05 | Over | 3  | 0.195293 | less | NM_021090,NM_153050,NM_153051                 | MTMR3          |
| protein secretion                                         | 3 | 28  | 0.000159 | Over | 15 | 0.432582 | more | NM_001077490,NM_016592,NM_080425              | GNAS           |
| sister chromatid cohesion                                 | 2 | 4   | 0.000166 | Over | 10 | 0.74389  | more | NM_001048205,NM_005132                        | REC8           |
| inositol or phosphatidylinositol phosphatase activity     | 3 | 29  | 0.000175 | Over | 3  | 0.195293 | less | NM_021090,NM_153050,NM_153051                 | MTMR3          |
| heterotrimeric G-protein complex                          | 3 | 37  | 0.000341 | Over | 15 | 0.432582 | more | NM_001077490,NM_016592,NM_080425              | GNAS           |
| transcription repressor activity                          | 4 | 94  | 0.000365 | Over | 16 | 0.679309 | more | NM_001077440,NM_001077441,NM_002166,NM_014739 | BCLAF1,LD2     |
| protein serine/threonine phosphatase activity             | 3 | 52  | 0.000871 | Over | 3  | 0.195293 | less | NM_021090,NM_153050,NM_153051                 | MTMR3          |
| Golgi apparatus                                           | 5 | 208 | 0.000872 | Over | 21 | 0.530855 | more | NM_007161,NM_205837,NM_205839,NM_205840       | LST1           |
| negative regulation of transcription                      | 4 | 120 | 0.000881 | Over | 16 | 0.679309 | more | NM_001077440,NM_001077441,NM_002166,NM_014739 | BCLAF1,LD2     |

|                                                         |    |      |          |      |    |          |      |                                                                                                                                                                                                                                                                                                                       |
|---------------------------------------------------------|----|------|----------|------|----|----------|------|-----------------------------------------------------------------------------------------------------------------------------------------------------------------------------------------------------------------------------------------------------------------------------------------------------------------------|
| nucleocytop<br>lasmic<br>transporter<br>activity        | 2  | 13   | 0.001135 | Over | 14 | 0.265473 | more | NM_0230<br>11,NM_08 UPF3A<br>0687                                                                                                                                                                                                                                                                                     |
| female<br>pregnancy                                     | 3  | 65   | 0.001609 | Over | 15 | 0.432582 | more | NM_0010<br>77490,NM<br>_016592, GNAS<br>NM_0804<br>25                                                                                                                                                                                                                                                                 |
| cytoplasm                                               | 15 | 1867 | 0.002348 | Over | 55 | 0.400425 | more | NM_0003<br>83,NM_00<br>1077490,<br>NM_0012<br>56,NM_00<br>7161,NM_<br>016592,N<br>M_02109<br>0,NM_023<br>011,NM_0<br>80425,NM<br>_080687,<br>NM_1530<br>50,NM_15<br>3051,NM_<br>205837,N<br>M_20583<br>8,NM_205<br>839,NM_2<br>05840<br><br>NM_0201<br>85,NM_02<br>1090,NM_ DUSP22,<br>153050,N MTMR3<br>M_15305<br>1 |
| protein<br>tyrosine<br>phosphatas<br>e activity         | 4  | 164  | 0.002666 | Over | 12 | 1        | more | NM_0022<br>43,NM_17 KCNJ15<br>0736                                                                                                                                                                                                                                                                                    |
| inward<br>rectifier<br>potassium<br>channel<br>activity | 2  | 21   | 0.002687 | Over | 8  | 1        | more | NM_0010<br>48205,NM REC8<br>_005132                                                                                                                                                                                                                                                                                   |
| nuclear<br>chromosom<br>e                               | 2  | 21   | 0.002687 | Over | 10 | 0.74389  | more | NM_0010<br>06641,NM<br>_014581,<br>NM_0230<br>11,NM_08 SLC25A2<br>0687,NM_ 5,OBP2B,<br>198999,N UPF3A,S<br>M_20688 LC26A5<br>3,NM_206<br>884,NM_2<br>06885                                                                                                                                                            |
| transport                                               | 8  | 697  | 0.003369 | Over | 56 | 0.01602  | more |                                                                                                                                                                                                                                                                                                                       |

|                                                                                   |   |     |          |      |     |          |      |                                         |              |
|-----------------------------------------------------------------------------------|---|-----|----------|------|-----|----------|------|-----------------------------------------|--------------|
| mRNA catabolic process, nonsense-mediated decay                                   | 2 | 25  | 0.003694 | Over | 14  | 0.265473 | more | NM_023011,NM_080687                     | UPF3A        |
| antigen processing and presentation of endogenous antigen                         | 2 | 25  | 0.003694 | Over | 125 | 3.44E-10 | more | NM_002116,NM_002127                     | HLA-A,HLA-G  |
| sensory perception of sound                                                       | 4 | 192 | 0.004601 | Over | 36  | 0.028165 | more | NM_198999,NM_206883,NM_206884,NM_206885 | SLC26A5      |
| MHC class I protein complex                                                       | 2 | 30  | 0.005161 | Over | 125 | 3.44E-10 | more | NM_002116,NM_002127                     | HLA-A,HLA-G  |
| antigen processing and presentation of endogenous peptide antigen via MHC class I | 2 | 33  | 0.00615  | Over | 125 | 3.44E-10 | more | NM_002116,NM_002127                     | HLA-A,HLA-G  |
| meiotic recombination                                                             | 2 | 33  | 0.00615  | Over | 10  | 0.74389  | more | NM_001048205,NM_005132                  | REC8         |
| hematopoietin/interferon-class (D200-domain) cytokine receptor activity           | 2 | 34  | 0.006497 | Over | 2   | 0.288737 | less | NM_004512,NM_147162                     | IL11RA       |
| chromosome organization and biogenesis                                            | 3 | 109 | 0.006541 | Over | 18  | 0.303638 | more | NM_000474,NM_001048205,NM_005132        | TWIST1, REC8 |
| mitotic metaphase/anaphase transition                                             | 1 | 1   | 0.006616 | Over | 1   | 0.461028 | less | NM_001256                               | CDC27        |
| MHC class I receptor activity                                                     | 2 | 36  | 0.007217 | Over | 125 | 3.44E-10 | more | NM_002116,NM_002127                     | HLA-A,HLA-G  |

|                                                                   |   |     |          |      |     |          |        |                                                   |                  |
|-------------------------------------------------------------------|---|-----|----------|------|-----|----------|--------|---------------------------------------------------|------------------|
| skeletal development                                              | 3 | 115 | 0.007545 | Over | 24  | 0.109163 | more   | NM_000474,NM_001007139,NM_005220                  | TWIST1,IGF2,DLX3 |
| antigen processing and presentation                               | 2 | 38  | 0.007972 | Over | 125 | 3.44E-10 | more   | NM_002116,NM_002127                               | HLA-A,HLA-G      |
| protein amino acid dephosphorylation                              | 4 | 235 | 0.009103 | Over | 12  |          | 1 more | NM_020185,NM_021090,NM_153050,NM_153051           | DUSP22,MTMR3     |
| aspartoacylase activity                                           | 1 | 2   | 0.009908 | Over | 13  | 0.132352 | more   | NM_080658                                         | ACY3             |
| prothoracicotropic hormone activity                               | 1 | 3   | 0.013188 | Over | 8   | 0.460406 | more   | NM_001007139                                      | IGF2             |
| protein-L-isoaspartate (D-aspartate) O-methyltransferase activity | 1 | 3   | 0.013188 | Over | 6   | 0.68346  | more   | NM_005389                                         | PCMT1            |
| odorant binding                                                   | 1 | 3   | 0.013188 | Over | 2   |          | 1 less | NM_014581                                         | OBP2B            |
| meiosis                                                           | 2 | 55  | 0.015702 | Over | 10  | 0.74389  | more   | NM_001048205,NM_005132                            | REC8             |
| chemosensory behavior                                             | 1 | 4   | 0.016458 | Over | 2   |          | 1 less | NM_014581                                         | OBP2B            |
| transporter activity                                              | 5 | 437 | 0.017944 | Over | 38  | 0.040647 | more   | NM_014581,NM_198999,NM_206883,NM_206884,NM_206885 | OBP2B,SLC26A5    |
| mRNA export from nucleus                                          | 2 | 64  | 0.020684 | Over | 14  | 0.265473 | more   | NM_023011,NM_080687                               | UPF3A            |
| induction of apoptosis                                            | 3 | 173 | 0.021822 | Over | 12  | 0.77231  | more   | NM_001077440,NM_00107741,NM_014739                | BCLAF1           |

|                                                      |   |     |          |      |    |          |      |                                                   |        |
|------------------------------------------------------|---|-----|----------|------|----|----------|------|---------------------------------------------------|--------|
| immune response                                      | 5 | 466 | 0.022774 | Over | 21 | 0.530855 | more | NM_007161,NM_205837,NM_205838,NM_205839,NM_205840 | LST1   |
| negative regulation of S phase of mitotic cell cycle | 1 | 6   | 0.022964 | Over | 3  | 1        | more | NM_173075                                         | APBB2  |
| cytoplasmic dynein complex                           | 1 | 6   | 0.022964 | Over | 2  | 1        | less | NM_006519                                         | DYNLT1 |
| voltage-gated ion channel activity                   | 2 | 68  | 0.023081 | Over | 8  | 1        | more | NM_002243,NM_170736                               | KCNJ15 |

---
