# Supplementary material for: The DNA Methylome of Human Peripheral Blood Mononuclear Cells
Source: PLoS Biol. 2010 Nov 9;8(11):e1000533. doi: 10.1371/journal.pbio.1000533 (PMC2976721; doi:10.1371/journal.pbio.1000533)
Supplement: Table S8 — Validation of methylation level of CpG by Sanger sequencing. (0.03 MB PDF) [file pbio.1000533.s020.pdf]

Table S8. Validation of methylation level of CpG by Sanger sequencing.

| Chr   | position  | GA sequencing |       | Sanger validation |       |
|-------|-----------|---------------|-------|-------------------|-------|
|       |           | methyalted    | total | methyalted        | total |
| chr1  | 114854255 | 0             | 22    | 1                 | 6     |
| chr1  | 114854325 | 0             | 13    | 0                 | 7     |
| chr1  | 114854333 | 0             | 15    | 0                 | 7     |
| chr1  | 114854352 | 0             | 10    | 0                 | 7     |
| chr1  | 114854365 | 0             | 11    | 0                 | 7     |
| chr5  | 118719538 | 2             | 7     | 0                 | 22    |
| chr5  | 118719546 | 2             | 4     | 0                 | 22    |
| chr5  | 118719551 | 2             | 4     | 0                 | 22    |
| chr5  | 118719593 | 2             | 9     | 1                 | 21    |
| chr5  | 118719596 | 0             | 10    | 1                 | 21    |
| chr5  | 118719602 | 2             | 7     | 1                 | 21    |
| chr5  | 118719609 | 0             | 8     | 0                 | 22    |
| chr5  | 118719619 | 1             | 7     | 0                 | 22    |
| chr5  | 118719627 | 1             | 8     | 1                 | 21    |
| chr5  | 118719632 | 0             | 7     | 0                 | 22    |
| chr5  | 118719636 | 1             | 6     | 1                 | 21    |
| chr5  | 118719650 | 1             | 5     | 1                 | 21    |
| chr5  | 118719657 | 0             | 6     | 1                 | 21    |
| chr5  | 178918949 | 4             | 11    | 4                 | 5     |
| chr5  | 178918978 | 7             | 7     | 4                 | 5     |
| chr5  | 178919006 | 5             | 8     | 5                 | 4     |
| chr5  | 178919010 | 7             | 7     | 4                 | 5     |
| chr5  | 178919018 | 4             | 10    | 3                 | 6     |
| chr5  | 178919073 | 1             | 8     | 3                 | 6     |
| chr5  | 178919087 | 1             | 5     | 3                 | 6     |
| chr12 | 380735    | 2             | 11    | 2                 | 26    |
| chr12 | 380737    | 2             | 11    | 8                 | 20    |
| chr12 | 380785    | 0             | 9     | 0                 | 28    |
| chr12 | 380796    | 0             | 10    | 0                 | 28    |
| chr12 | 380811    | 0             | 12    | 0                 | 28    |
| chr12 | 380823    | 0             | 9     | 1                 | 27    |
| chr12 | 380837    | 0             | 11    | 0                 | 28    |
| chr12 | 380855    | 0             | 11    | 0                 | 28    |
| chr12 | 380858    | 0             | 12    | 0                 | 28    |
| chr12 | 380863    | 1             | 10    | 0                 | 28    |
| chr13 | 45525428  | 1             | 13    | 2                 | 23    |
| chr13 | 45525473  | 3             | 19    | 2                 | 23    |
| chr13 | 45525476  | 6             | 15    | 4                 | 21    |
| chr13 | 45525504  | 5             | 24    | 1                 | 24    |
| chr13 | 45525507  | 6             | 22    | 1                 | 24    |
| chr15 | 49700242  | 9             | 9     | 18                | 5     |
| chr15 | 49700249  | 9             | 9     | 16                | 7     |
| chr16 | 88250809  | 0             | 4     | 3                 | 21    |
| chr16 | 88250816  | 0             | 4     | 2                 | 22    |
| chr17 | 1477466   | 1             | 9     | 0                 | 25    |
| chr17 | 1477471   | 2             | 9     | 1                 | 24    |
| chr17 | 1477534   | 2             | 8     | 2                 | 23    |
| chr17 | 1477542   | 5             | 7     | 11                | 14    |
| chr17 | 1477554   | 4             | 9     | 8                 | 17    |
| chr17 | 1477566   | 1             | 12    | 3                 | 22    |
